# Supplementary material
Source: PubMed Central journal article supplement (PMC3568628)
Supplement: AEM.03008-12_zam999104125so1.pdf [file AEM.03008-12_zam999104125so1.pdf]

Surface orientation affects the direction of cone growth by *Leptolyngbya* sp. C1, a likely architect of Octopus Spring coniform structures.

Supplemental Information

Running title: Cyanobacterial coniform structures

Journal section: Environmental Microbiology

Kristina Reyes<sup>1</sup>, Nicolas I. Gonzalez III<sup>1</sup>, Joshua Stewart<sup>1</sup>, Frank Ospino<sup>1</sup>, Dickie Nguyen<sup>1</sup>, David T. Cho<sup>1</sup>, Nahal Ghahremani<sup>1</sup>, John R. Spear<sup>2</sup>, and Hope A. Johnson<sup>#1</sup>

<sup>1</sup> Department of Biological Science, Center for Applied Biotechnology Studies,  
California State University Fullerton, Fullerton, CA 92834

<sup>2</sup>Department of Civil and Environmental Engineering, Colorado School of Mines,  
Golden, CO 80401

# hajohnson@fullerton.edu

## **Materials and Methods**

### **Enrichment of heterotrophs from Octopus Spring cones**

Heterotrophs were isolated by plating on Bacto nutrient agar (Difco), R2A agar (Difco), MacConkey agar (Difco), starch agar (Difco), antibiotic medium 2 (Difco) in the absence of antibiotics, bismuth sulfite agar (Difco), malic acid media (10 g malic acid, 0.02 g magnesium sulfate, 0.02 g potassium chloride, 3 g potassium phosphate dibasic, 2 g sodium phosphate monobasic, 0.005 g ferric citrate, 0.1 g calcium carbonate, 1.5 mg boric acid, 0.8 mg manganese sulfate, 0.6 mg zinc sulfate, 0.1 mg cupric sulfate, 0.2 mg ammonium molybdate, and 0.01 mg cobaltous sulfate per liter) and on media prepared by autoclaving agar cultures of well grown *Leptolyngbya* sp. C1 enrichments grown on D media, homogenized, and then re-poured into plates (cyano soup media). All single colonies were transferred a minimum of three times. Inoculated plates were incubated at 37° C in the dark.

### **Isolate identification**

Isolates were identified by 16S rRNA gene sequencing. 16S rRNA genes were amplified with 8F and 1492R as described (23). The sequence was determined using the same primers. Primer 515F was also used if necessary for more complete coverage of the 16S rRNA gene. Gene sequences were deposited in Genbank with the following accession numbers KC182742-KC182752.

### **Motility and exopolysaccharide production**

Soft agar (4 g/l) was used to detect motility. Motility was assayed in plates and tubes using the media of isolation. Cells were positive for motility if they were able to spread away from the original streak line or stab. EPS production was determined by calcofluor binding and fluorescence of cultures grown on their respective agar plates with 0.02 % calcofluor added (18).

## **Results and Discussion**

### **Microbial Isolation**

In order to identify more of the heterotrophic diversity than may have been captured using the clone library, and to identify specific intrinsic physiological capabilities that may influence cone formation, cultures were initiated to enrich and isolate cyanobacteria and aerobic heterotrophs. Ten different heterotrophs were isolated and 1 cyanobacterium was enriched from the Octopus Spring cones (Table S1).

Sequencing of the 16S rRNA gene was used to identify close relatives of the isolates. There was no overlap between the heterotrophs identified in the clone library and the isolates. This is not necessarily surprising since many clones with sequences corresponding to known heterotrophs identified in the library were only present once, suggesting that heterotrophs are not likely to be abundant, are much more diverse than the cyanobacterial population, and that saturation in the clone library

was not achieved. Thus, the isolation of heterotrophs is quite complementary as this approach was able to identify additional organisms. OS1 is a *Staphylococcus* sp. isolate that has close relatives associated with the filamentous cyanobacterium *Arthrospira platensis* (10). It also appears to be ubiquitous including insect guts (7, 24), which may have served as its original mechanism of dispersal to the cone in Octopus Spring. *Aeromonas* OS5 and OS6 have also been identified in insect guts (Accession JN644562 and (13), respectively). OS2 is an *Arthrobacter* sp. isolate. Related clones and isolates have been identified in metal rich environments (8, 19). They have also been identified in association with a decaying Microcystic bloom (Accession HQ904194) and in algal-bacterial consortia (Accession AB552850), which would suggest this organism may be able to thrive growing in close association with cyanobacteria. The 16S rRNA gene from *Agrobacterium* sp. OS3 has 98% identity to a clone from a library derived from bacteria growing on *Microcystis* sp. exudates (12). *Chryseobacterium* sp. OS7 is also related to isolates living on *Microcystis* (Accession HQ896846). *Pseudomonas* sp. OS4 is closely related to aquatic bacteria (Accession EF575036) and a clone identified in association with coral (Accession JQ347400). *Paracoccus* sp. CS4 is ubiquitous being found in dust (1), sediment (17), and seawater (Accession FJ96075). *Microbacterium* CS2 is closely related to isolates from alkaline groundwater (22), a symbiont of the cyanobacterium *Chlorella sorokiniana* IAM C-212 (15), and cyanobacterial lysing bacteria (Accession AB610601).

As noted above, many of the isolates identified have relatives that are also found in close associations with cyanobacteria. As evident from the microscopy (Figure 2), the cyanobacteria in the cones are living in physical proximity with non-chlorophyll *a* containing cells which could benefit from this association by metabolizing the cyanobacterial exudates (3, 4). This is evident in the *Leptolyngbya* C1 enrichment. Although the *Pseudomonas* sp. OS4 can grow on nutrient rich agar, it can only grow on the autotrophic D media when *Leptolyngbya* sp. C1 is also present. Isolates enriched on the cyanosoup media are also able to thrive on *Leptolyngbya* produced products. Interspecies carbon flow may be important in determining coniform morphology.

### **Characterization of Isolates and Cyanobacterial Enrichment**

The isolates were examined for traits that are suspected to be important in cone formation such as phototaxis, motility, and exopolysaccharide production (Table S1). The possession of these traits by different strains may suggest their potential role in cone formation. Not surprisingly, only *Leptolyngbya* sp. C1 was able to positively phototax. Also, under the conditions tested (low % agar), only three of the heterotrophic isolates, *Staphylococcus* sp. OS1, *Arthrobacter* sp. OS2, and *Pseudomonas* sp. OS4 were motile. Motility would be required to ultimately aid in the formation of the cone, move from the base to the tip of the cone, and potentially escape lithification. Several of the strains did produce EPS under the test conditions (Table 1). Genes involved in the biosynthesis and degradation of EPS have been identified in the metagenomes of microbialites (6) and stromatolites (16). EPS likely plays a role in the structural formation of the cone, protecting the structure

from shear stress, precipitation of silica during cooling and evaporation of water (9, 14), and subsequent trapping and binding of sand grains (20) and/or other particulate matter. It can act as a source of nutrients for a community of microbes serving as an intermediate in the flow of carbon from autotrophs to heterotrophs, but it is interesting to note that the heterotrophic isolates also produced EPS. Heterotrophic production of EPS could play a role in lithification and formation of cones since not all cyanobacteria can form cones (5). The physical and chemical properties of the EPS may affect the ability to form cones thus EPS from different organisms may render different morphologies and different degrees of lithification. Although not relevant to these cones found in a siliceous spring, EPS has also been shown to mediate carbonate precipitation (2, 11, 21) by the ability to trap calcium and then release calcium upon its degradation by heterotrophs such as fermenters and sulfate reducing bacteria. EPS may also aid carbonate mineralization by acting as a precipitation template (11).

## References

1. **Alenius, H., J. Pakarinen, O. Saris, M. A. Andersson, M. Leino, K. Sirola, M. L. Majuri, J. Niemela, S. Matikainen, H. Wolff, L. von Hertzen, M. Makela, T. Haahtela, and M. Salkinoja-Salonen.** 2009. Contrasting immunological effects of two disparate dusts - preliminary observations. *Int Arch Allergy Immunol* **149**:81-90.
2. **Arp, G., A. Reimer, and J. Reitner.** 2001. Photosynthesis-induced biofilm calcification and calcium concentrations in phanerozoic oceans. *Science* **292**:1701-1704.
3. **Bateson, M. M., and D. M. Ward.** 1988. Photoexcretion and fate of glycolate in a hot spring cyanobacterial mat. *Appl Environ Microbiol* **54**:1738-43.
4. **Bauld, J., and T. D. Brock.** 1974. Algal excretion and bacterial assimilation in hot spring algal mats. *J Phycol* **10**:101-106.
5. **Bosak, T., B. Liang, T. D. Wu, S. P. Templer, A. Evans, H. Vali, J. L. Guerquin-Kern, V. Klepac-Ceraj, M. S. Sim, and J. Mui.** 2012. Cyanobacterial diversity and activity in modern conical microbialites. *Geobiology*.
6. **Breitbart, M., A. Hoare, A. Nitti, J. Siefert, M. Haynes, E. Dinsdale, R. Edwards, V. Souza, F. Rohwer, and D. Hollander.** 2009. Metagenomic and stable isotopic analyses of modern freshwater microbialites in Cuatro Ciénegas, Mexico. *Environ Microbiol* **11**:16-34.
7. **Broderick, N. A., K. F. Raffa, R. M. Goodman, and J. Handelsman.** 2004. Census of the bacterial community of the gypsy moth larval midgut by using culturing and culture-independent methods. *Appl Environ Microbiol* **70**:293-300.
8. **Brodie, E. L., T. Z. Desantis, D. C. Joyner, S. M. Baek, J. T. Larsen, G. L. Andersen, T. C. Hazen, P. M. Richardson, D. J. Herman, T. K. Tokunaga, J. M. Wan, and M. K. Firestone.** 2006. Application of a high-density oligonucleotide microarray approach to study bacterial population dynamics

- during uranium reduction and reoxidation. *Appl Environ Microbiol* **72**:6288-98.
9. **Cady, S. L., and J. D. Farmer.** 1996. Fossilization processes in siliceous thermal springs: trends in preservation along thermal gradients. *Ciba Found Symp* **202**:150-70; discussion 170-3.
  10. **Choi, G. G., M. S. Bae, C. Y. Ahn, and H. M. Oh.** 2008. Induction of axenic culture of *Arthrospira* (*Spirulina*) *platensis* based on antibiotic sensitivity of contaminating bacteria. *Biotechnol Lett* **30**:87-92.
  11. **Dupraz, C., and P. T. Visscher.** 2005. Microbial lithification in marine stromatolites and hypersaline mats. *Trends Microbiol* **13**:429-38.
  12. **Dziallas, C., and H. P. Grossart.** 2011. Temperature and biotic factors influence bacterial communities associated with the cyanobacterium *Microcystis* sp. *Environ Microbiol* **13**:1632-41.
  13. **Gupta, A. K., D. Nayduch, P. Verma, B. Shah, H. V. Ghate, M. S. Patole, and Y. S. Shouche.** 2012. Phylogenetic characterization of bacteria in the gut of house flies (*Musca domestica* L.). *FEMS Microbiol Ecol* **79**:581-93.
  14. **Handley, K. M., S. J. Turner, K. A. Campbell, and B. W. Mountain.** 2008. Silicifying biofilm exopolymers on a hot-spring microstromatolite: templating nanometer-thick laminae. *Astrobiology* **8**:747-70.
  15. **Imase, M., K. Watanabe, H. Aoyagi, and H. Tanaka.** 2008. Construction of an artificial symbiotic community using a *Chlorella*-symbiont association as a model. *FEMS Microbiol Ecol* **63**:273-82.
  16. **Khodadad, C. L., and J. S. Foster.** Metagenomic and metabolic profiling of nonlithifying and lithifying stromatolitic mats of Highborne Cay, The Bahamas. *PLoS One* **7**:e38229.
  17. **Li, H. F., J. H. Qu, J. S. Yang, Z. J. Li, and H. L. Yuan.** 2009. *Paracoccus chinensis* sp. nov., isolated from sediment of a reservoir. *Int J Syst Evol Microbiol* **59**:2670-4.
  18. **Long, S., J. W. Reed, J. Himawan, and G. C. Walker.** 1988. Genetic analysis of a cluster of genes required for synthesis of the calcofluor-binding exopolysaccharide of *Rhizobium meliloti*. *J Bacteriol* **170**:4239-48.
  19. **Mendez, M. O., J. W. Neilson, and R. M. Maier.** 2008. Characterization of a bacterial community in an abandoned semiarid lead-zinc mine tailing site. *Appl Environ Microbiol* **74**:3899-907.
  20. **Reid, R. P., P. T. Visscher, A. W. Decho, J. F. Stolz, B. M. Bebout, C. Dupraz, L. G. Macintyre, H. W. Paerl, J. L. Pinckney, L. Prufert-Bebout, T. F. Steppe, and D. J. DesMarais.** 2000. The role of microbes in accretion, lamination and early lithification of modern marine stromatolites. *Nature* **406**:989-992.
  21. **Shiraishi, F., A. Bissett, D. de Beer, A. Reimer, and G. Arp.** 2008. Photosynthesis, respiration and exopolymer calcium-binding in biofilm calcification (Westerhfer and deinschwanger creek, germany). *Geomicrobiology Journal* **25**:83-94.
  22. **Tiago, I., A. P. Chung, and A. Verissimo.** 2004. Bacterial diversity in a nonsaline alkaline environment: heterotrophic aerobic populations. *Appl Environ Microbiol* **70**:7378-87.

23. **Turner, S., K. M. Pryer, V. P. Miao, and J. D. Palmer.** 1999. Investigating deep phylogenetic relationships among cyanobacteria and plastids by small subunit rRNA sequence analysis. *J Eukaryot Microbiol* **46**:327-38.
24. **Yoshiyama, M., and K. Kimura.** 2009. Bacteria in the gut of Japanese honeybee, *Apis cerana japonica*, and their antagonistic effect against *Paenibacillus larvae*, the causal agent of American foulbrood. *J Invertebr Pathol* **102**:91-6.

Table S1. Isolates and enrichment culture from coniform structure.

| Isolate               | Media      | Top Genbank Hit                                                           | % Identity | Motility | EPS | Shape    |
|-----------------------|------------|---------------------------------------------------------------------------|------------|----------|-----|----------|
| OS1                   | R2A        | <i>Staphylococcus saprophyticus</i>                                       | 99         | +        | +   | Cocci    |
| OS2                   | R2A        | <i>Arthrobacter oxydans</i>                                               | 99         | +        | +   | Rod      |
| OS3                   | Malic Acid | <i>Agrobacterium albertimagni</i>                                         | 99         | -        | -   | Rod      |
| OS4                   | Starch     | <i>Pseudomonas sp.</i>                                                    | 99         | +        | +   | Rod      |
| OS5                   | Antibiotic | <i>Aeromonas fluviialis</i>                                               | 99         | -        | +   | Rod      |
| OS6                   | Bismuth    | <i>Aeromonas hydrophila</i>                                               | 100        | -        | +   | Rod      |
| OS7                   | Antibiotic | <i>Chryseobacterium sp.</i>                                               | 99         | -        | -   | Rod      |
| CS2                   | Cyanosoup  | <i>Microbacterium oxydans</i>                                             | 100        | -        | -   | Rod      |
| CS3                   | Cyanosoup  | <i>Afipia sp.</i>                                                         | 99         | -        | -   | Rod      |
| CS4                   | Cyanosoup  | <i>Paracoccus sp.</i>                                                     | 99         | -        | +   | Rod      |
| C1<br>enrich-<br>ment | D          | <i>Leptolyngbya sp.</i><br>(also contains<br><i>Pseudomonas sp. OS4</i> ) | 97         | +        | +   | Filament |
